# Supplementary material for: Enhanced Actuation Performance of Polymeric Composites by Simultaneously Incorporating Covalent-Bond-Functionalized Dielectric Nanoparticles and Polar Plasticizer
Source: MDPI journal article supplement (doi:10.3390/polym14194218), 2022-10-08
Supplement: s1 [file s1]

## **Supplementary Information**

### **Enhanced Actuation Performance of Polymeric Composites by Simultaneously Incorporating Covalent-Bond-Functionalized Dielectric Nanoparticles and Polar Plasticizer**

Huiwan Lu,<sup>1,2</sup> Dan Yang<sup>1,\*</sup>

<sup>1</sup>College of Materials Science and Engineering, Beijing University of Chemical Technology, Beijing University of Chemical Technology, Beijing 100029, China

<sup>2</sup>College of New Materials and Chemical Engineering, Beijing Institute of Petrochemical Technology, Beijing 102617, China

\*Corresponding author. E-mail: D. Yang (danyang@buct.edu.cn)

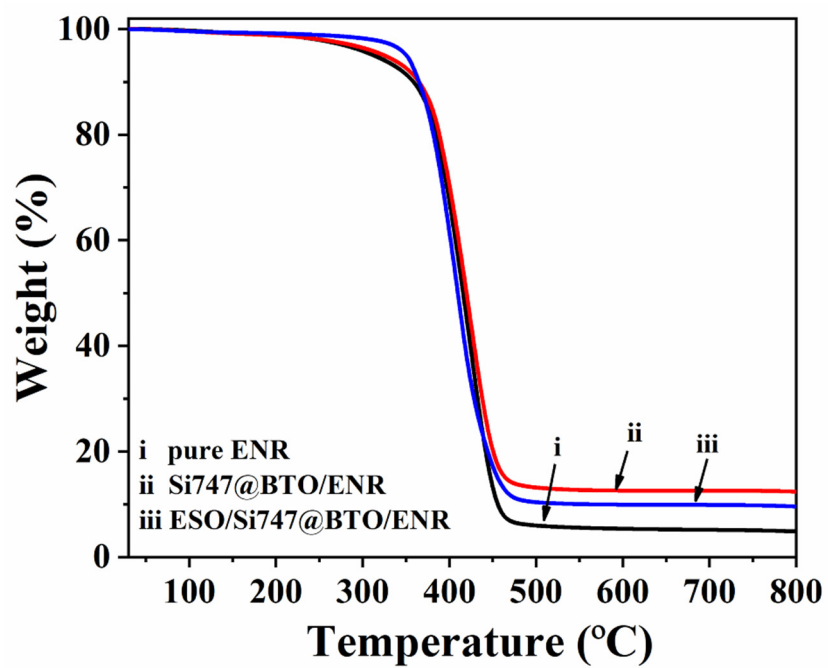

**Figure S1.** TGA curves of pure ENR, 10 phr Si747@BTO/ENR, and 50 phr ESO/  
Si747@BTO/ENR composite.

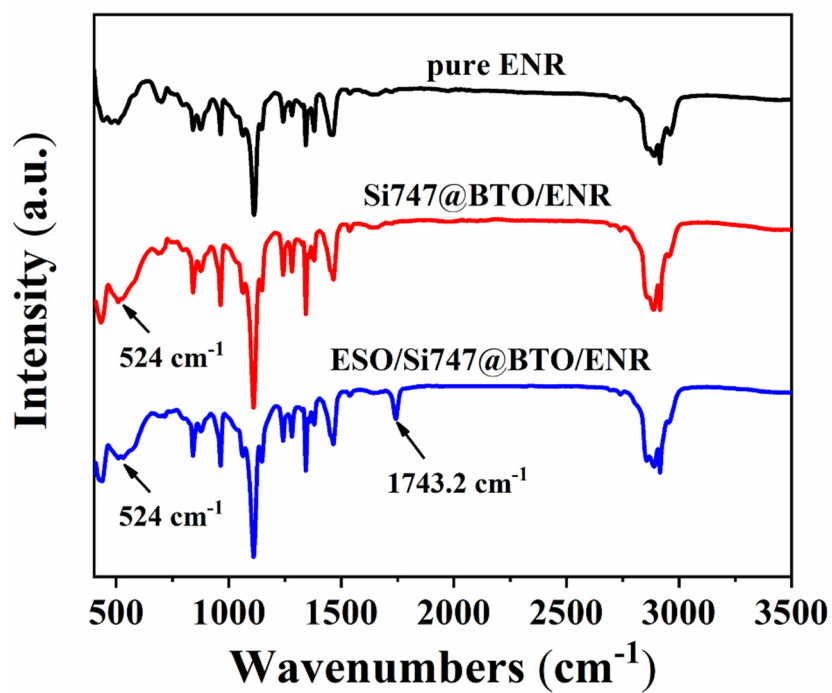

**Figure S2.** FTIR spectra of pure ENR, 10 phr Si747@BTO/ENR, and 50 phr ESO/Si747@BTO/ENR composite.
